# Supplementary material
Source: PubMed Central journal article supplement (PMC7817207)
Supplement: pnas.2007526118.sd01.pdf [file pnas.2007526118.sd01.pdf]

1  
Eggtttcacagagtccataggttcagcctaccatagattgaaaacatttgggggaagaaattatgtctataactaacatgtacagacttttaagcttacag  
aligned sequence mEGFP-ITSN1  
F-----TCTATACTAACATGTACAGACTTTTAAGCTTACAG  
aligned sequence sequencing F  
F-----  
aligned sequence sequencing R

101  
aataacagttggtttacatagcatttaccttgattaaatattgtaagtaatctagagattatttgaagtatgcaagaggacgtgcttaggttatatgcaa  
aligned sequence mEGFP-ITSN1  
AATAACAGTTGTTTACATAGCATTTACCTTGATTAAATATTGTAAGTAATCTAGAGATTATTTGAAGTATGCAAGAGGACGTGCTTAGGTTATATGCAA  
aligned sequence sequencing F  
-----  
aligned sequence sequencing R

201  
atactgtgccatTTTATATCAGGGACTTGAGGATCCACGGATTTTTTTTTAATCCATGGGAGGTCTTGAACCAGTGTCTCTGGGATAATGAGGGACAAC  
aligned sequence mEGFP-ITSN1  
ATACTGTGCCATTTTATATCAGGGACTTGAGGATCCACGGATTTTTTTTTAATCCATGGGAGGTCTTGAACCAGTGTCTCTGGGATAATGAGGGACAAC  
aligned sequence sequencing F  
-----  
aligned sequence sequencing R

301  
tgtatacttaaaaagtaaacacgtgaatgaatgaattccttaattgtagagctatgctctggctctagtattagtcctctgaccattaaagatagcatggt  
aligned sequence mEGFP-ITSN1  
TGTATACTTAAAAAGTAACACGTGAATGAATGAATTCCTTAATTGTAGAGCTATGCTCTGGCTCTAGTATTAGTCCTCTGACCATTAAGATAGCATGTT  
aligned sequence sequencing F  
-----AGCATGTT  
aligned sequence sequencing R

401  
ggtgtgtttatgattatacaggaattaagttttcataaacttaaattgttgcatTTTcacttacaggcgtcgattagcaaggtaaaagtaacagaaccatg  
aligned sequence mEGFP-ITSN1  
GGTGTGTTTATGATTATACAGGAATTAAGTTTTTCATAAACTTAAATGTTGCATTTTCACTTACAGGCGTCGATTAGCAAGGTAAAAGTAACAGAACCATG  
aligned sequence sequencing F  
GGTGTGTTTATGATTATACAGGAATTAAGTTTTTCATAAACTTAAATGTTGCATTTTCACTTACAGGCGTCGATTAGCAAGGTAAAAGTAACAGAACCATG  
aligned sequence sequencing R

501  
GTGAGCAAGGGCGAGGAGCTGTTACCGGGTGGTGCCCATCCTGGTCGAGCTGGACGGCGACGTAACGGCCACAAGTTCAGCGTGTCCGGCGAGGGCG  
aligned sequence mEGFP-ITSN1  
GTGAGCAAGGGCGAGGAGCTGTTACCGGGTGGTGCCCATCCTGGTCGAGCTGGACGGCGACGTAACGGCCACAAGTTCAGCGTGTCCGGCGAGGGCG  
aligned sequence sequencing F  
GTGAGCAAGGGCGAGGAGCTGTTACCGGGTGGTGCCCATCCTGGTCGAGCTGGACGGCGACGTAACGGCCACAAGTTCAGCGTGTCCGGCGAGGGCG  
aligned sequence sequencing R

610

AGGGCGATGCCACCTACGGCAAGCTGACCCTGAAGTTCATCTGCACCACCGGCAAGCTGCCCGTGCCCTGGCCCACCCTCGTGACCACCCTGACCTACGG  
aligned sequence mEGFP-ITSN1

AGGGCGATGCCACCTACGGCAAGCTGACCCTGAAGTTCATCTGCACCACCGGCAAGCTGCCCGTGCCCTGGCCCACCCTCGTGACCACCCTGACCTACGG  
aligned sequence sequencing F

AGGGCGATGCCACCTACGGCAAGCTGACCCTGAAGTTCATCTGCACCACCGGCAAGCTGCCCGTGCCCTGGCCCACCCTCGTGACCACCCTGACCTACGG  
aligned sequence sequencing R

701

CGTGCAGTGCTTCAGCCGCTACCCCGACCACATGAAGCAGCAGACTTCTTCAAGTCCGCCATGCCCGAAGGCTACGTCCAGGAGCGCACCATCTTCTTC  
aligned sequence mEGFP-ITSN1

CGTGCAGTGCTTCAGCCGCTACCCCGACCACATGAAGCAGCAGACTTCTTCAAGTCCGCCATGCCCGAAGGCTACGTCCAGGAGCGCACCATCTTCTTC  
aligned sequence sequencing F

CGTGCAGTGCTTCAGCCGCTACCCCGACCACATGAAGCAGCAGACTTCTTCAAGTCCGCCATGCCCGAAGGCTACGTCCAGGAGCGCACCATCTTCTTC  
aligned sequence sequencing R

801

AAGGACGACGGCAACTACAAGACCCGCGCCGAGGTGAAGTTCGAGGGCGACACCCTGGTGAACCGCATCGAGCTGAAGGGCATCGACTTCAAGGAGGACG  
aligned sequence mEGFP-ITSN1

AAGGACGACGGCAACTACAAGACCCGCGCCGAGGTGAAGTTCGAGGGCGACACCCTGGTGAACCGCATCGAGCTGAAGGGCATCGACTTCAAGGAGGACG  
aligned sequence sequencing F

AAGGACGACGGCAACTACAAGACCCGCGCCGAGGTGAAGTTCGAGGGCGACACCCTGGTGAACCGCATCGAGCTGAAGGGCATCGACTTCAAGGAGGACG  
aligned sequence sequencing R

901

GCAACATCCTGGGGCACAAGCTGGAGTACAACAGCCACAACGTCTATATCATGGCCGACAAGCAGAAGAACGGCATCAAGGTGAACTTCAAGAT  
aligned sequence mEGFP-ITSN1

GCAACATCCTGGGGCACAAGCTGGAGTACAACAGCCACAACGTCTATATCATGGCCGACAAGCAGAAGAACGGCATCAAGGTGAACTTCAAGAT  
aligned sequence sequencing F

GCAACATCCTGGGGCACAAGCTGGAGTACAACAGCCACAACGTCTATATCATGGCCGACAAGCAGAAGAACGGCATCAAGGTGAACTTCAAGAT  
aligned sequence sequencing R

1001

CCGCCACAACATCGAGGACGGCAGCGTGCAGCTCGCCGACCACTACCAGCAGAACACCCCATCGGCGACGGCCCCGTGCTGCTGCCCGACAACCACTAC  
aligned sequence mEGFP-ITSN1

CCGCCACAACATCGAGGACGGCAGCGTGCAGCTCGCCGACCACTACCAGCAGAACACCCCATCGGCGACGGCCCCGTGCTGCTGCCCGACAACCACTAC  
aligned sequence sequencing F

CCGCCACAACATCGAGGACGGCAGCGTGCAGCTCGCCGACCACTACCAGCAGAACACCCCATCGGCGACGGCCCCGTGCTGCTGCCCGACAACCACTAC  
aligned sequence sequencing R

1101

CTGAGCACCCAGTCCAAGCTGAGCAAAGACCCCAACGAGAAGCGCGATCACATGGTCTGCTGGAGTTCGTGACCGCCCGGGATCACTCTCGGCATGG

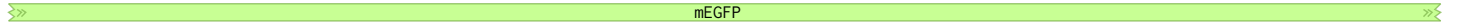

aligned sequence mEGFP-ITSN1

-----  
aligned sequence sequencing F

CTGAGCACCCAGTCCAAGCTGAGCAAAGACCCCAACGAGAAGCGCGATCACATGGTCTGCTGGAGTTCGTGACCGCCCGGGATCACTCTCGGCATGG

aligned sequence sequencing R

1201

ACGAGCTGTACAAGTCCGGAGGTACTIONCAGATCTCGAGGgctcagtttccaacaccttttgggtggaagttttcagaaatttctctttttaatgtactttg

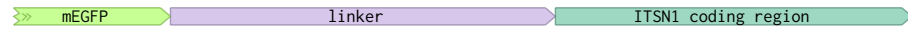

aligned sequence mEGFP-ITSN1

-----  
aligned sequence sequencing F

ACGAGCTGTACAAGTCCGGAGGTACTIONCAGATCTCGAGGGCTCAGTTTCCAACACCTTTTGGTGGTAAGTTTTCAGAAATTTCTCTTTTAAATGTACTTTG

aligned sequence sequencing R

1301

ggaccagatTTTAAAACTTgatatattggcaaatttaaattaaaaagtagagaaaataataataatcagcattcatgtattccatcatatagtttcatt

aligned sequence mEGFP-ITSN1

-----  
aligned sequence sequencing F

GGACCAGATTTTAAAACTTgatatattggcaaatttaaattaaaaagtagagaaaataataataatcagcattcatgtattccatcatatagtttcatt

aligned sequence sequencing R

1401

aattatcaactcatgcccaatattgtttcatctggattcttttggagcaactcccagcatcatttcatctataa

aligned sequence mEGFP-ITSN1

-----  
aligned sequence sequencing F

AATTATCAACTCATGCCCAATAT-----

aligned sequence sequencing R
